# Supplementary material for: Structure and elasticity of composite nanoparticle/polymer nanoshells (hybridosomes®)
Source: Royal Society of Chemistry journal article supplement (doi:10.1039/c7sm00705a), 2017-01-01
Supplement: c7sm00705a1.pdf [file c7sm00705a1.pdf]

## Structure and Elasticity of Composite Nanoparticle/Polymer Nanoshells (hybridosome®)

F. Sciortino, M. Thivolle, M. L. Kahn, C. Gaillard, S. Chevance, F. Gauffre

### 1. Re-swelling of the hybridosomes after osmotic compression

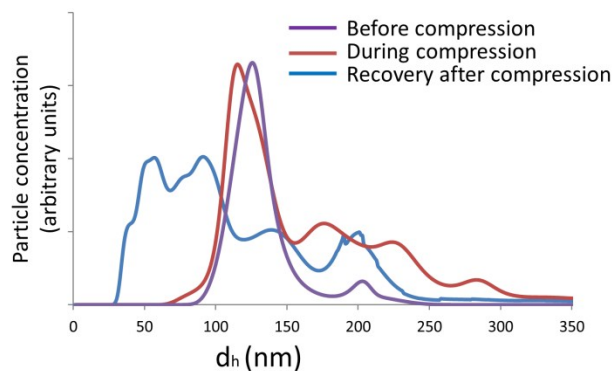

Figure S1: Size distribution of SPION hybridosomes before compression, during osmotic compression (PEG 10k, 150 g/L) and after magnetic separation and washing.

## 2. Fit of the linear compression domain.

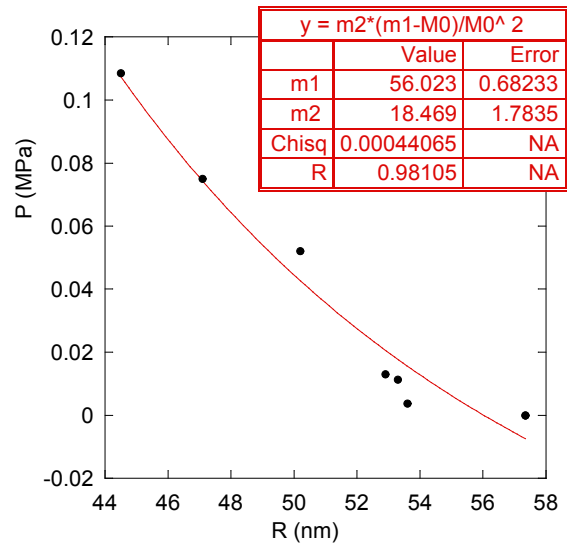

Figure S2: The data of figure 4a were merged for PEG 10K, and 20K and plotted as Pressure vs Radius and then fitted with Eq. 1.

## 3. Liquid AFM: Imaging applying increasing tip-sample interaction forces

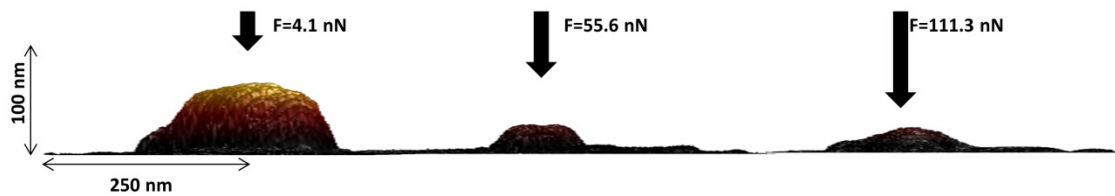

Figure S3: Height AFM images showing the evolution of the morphology of a single hybridosome at increasing values of loads from around 4 nN to 111 nN.

#### 4. Influence of the IONPs composition of the membrane on susceptibility to osmotic pressure

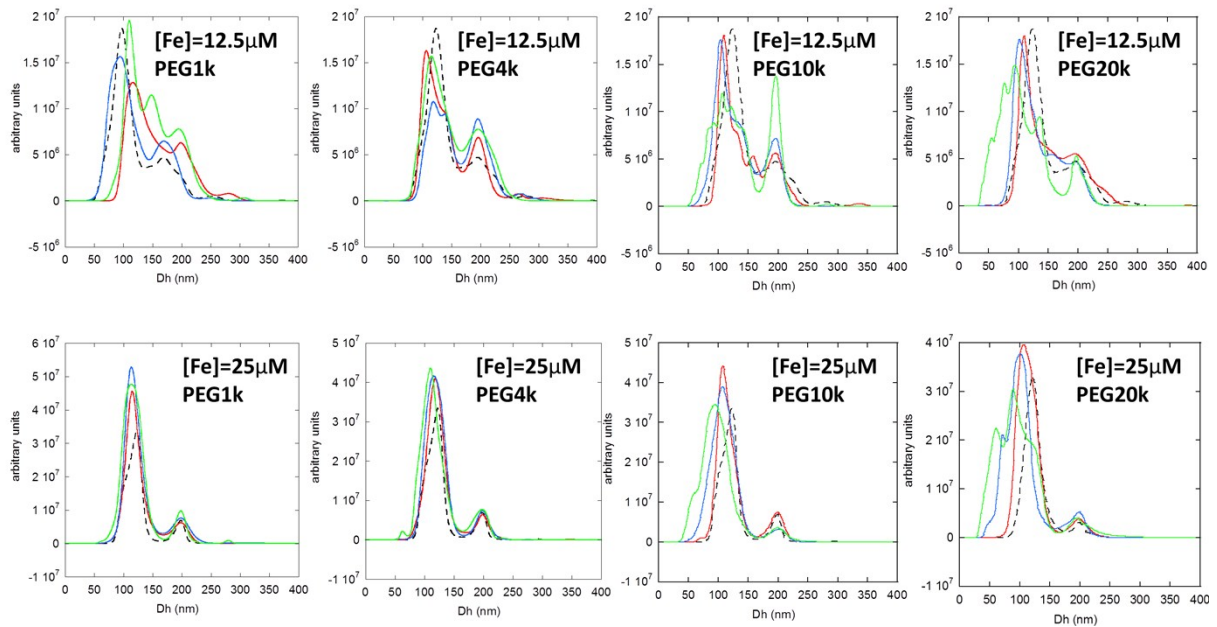

Figure S4: Osmotic compression of hybridosomes prepared from two different concentrations of IONPs ( $[AA]=2.25\text{mM}$ ) :  $[Fe]=12.5\mu\text{g/ml}$  (top row) and  $[Fe]=25\mu\text{g/ml}$  (bottom row), using PEG of different molecular weights: 1k; 4k; 10k; 20k, as indicated on graph. PEG concentrations: 0 g/L (black, dashed), 15 g/L (red), 50 g/L (blue), 75 g/L (green).
